# Supplementary material for: Validation and reliability of the rapid diagnostic test ‘SD Bioeasy Dengue Duo’ for dengue diagnosis in Brazil: a phase III study
Source: PubMed Central journal article supplement (PMC6014722; doi:10.1590/0074-02760170433), 2018-06-25
Supplement: 0074-0276-mioc-113-08-e170433-Suppl01.pdf [file 0074-0276-mioc-113-08-e170433-Suppl01.pdf]

TABLE I  
False negative and true positive result distribution for the rapid test SD Bioeasy Dengue Duo among categories defined by the result composition from the reference standard tests (MAC-ELISA IgM, virus isolation, and real-time polymerase chain reaction (RT-qPCR), Federal District (FD), 2014

| Reference standard (composition) | False negative<br>n (%) | True positive<br>n (%) |
|----------------------------------|-------------------------|------------------------|
| Mac IgM + / Isolation - / qPCR - | 33 (67.34)              | 84 (40.77)             |
| Mac IgM - / Isolation + / qPCR - | 1 (2.04)                | 1 (< 1)                |
| Mac IgM - / Isolation - / qPCR + | 4 (8.16)                | 14 (6.79)              |
| Mac IgM + / Isolation + / qPCR - | 0                       | 0                      |
| Mac IgM + / Isolation - / qPCR + | 5 (10.24)               | 50 (24.27)             |
| Mac IgM - / Isolation + / qPCR + | 6 (12.24)               | 48 (23.30)             |
| Mac IgM + / Isolation + / qPCR + | 0                       | 9 (4.36)               |
| Total                            | 49 (100)                | 206 (100)              |

TABLE II  
Comparison between the rapid test SD Bioeasy Dengue Duo and the standard reference methodologies [MAC-ELISA, real-time polymerase chain reaction (RT-qPCR, and virus isolation)], Federal District (FD), 2014

| Positive categories | Number (n) | Sample number with positive test (%) |             |            |             |
|---------------------|------------|--------------------------------------|-------------|------------|-------------|
|                     |            | SD IgM                               | SD NS1      | SD IgG     | SD NS1/IgM  |
| MAC-ELISA           | 143        | 72 (50.34)                           | 90 (62.93)  | 50 (34.96) | 105 (73.42) |
| RT-qPCR             | 121        | 30 (24.79)                           | 101 (83.47) | 16 (13.22) | 106 (87.60) |
| Virus isolation     | 58         | 3 (5.17)                             | 57 (87.93)  | 1 (1.72)   | 51 (87.93)  |

TABLE III  
Reliability of the rapid test 'SD Bioeasy Dengue Duo' in both acute and convalescent infection scenario, Federal District (FD), 2014

| Infection category         | Number (n) | Sensitivity (%)<br>[CI 95%]         |                                      |                                      | Specificity (%)<br>[CI 95%]         |                                    |                                    |
|----------------------------|------------|-------------------------------------|--------------------------------------|--------------------------------------|-------------------------------------|------------------------------------|------------------------------------|
|                            |            | SD IgM                              | SD NS1                               | SD IgM/NS1                           | SD IgM                              | SD NS1                             | SD IgM/NS1                         |
| Acute<br>(≤ 7 days)        | 362        | 34.73<br>(58/167)<br>[28.1 to 39.8] | 68.86<br>(115/167)<br>[62.1 to 73.8] | 78.44<br>(131/167)<br>[72.1 to 83.8] | 99.48<br>(194/195)<br>[97.6 to 100] | 98.97<br>(193/195)<br>[96 to 99.9] | 98.46<br>(192/195)<br>[96 to 99.9] |
| Convalescent<br>(> 7 days) | 47         | 50<br>(13/26)<br>[32.2 to 67.6]     | 53.84<br>(14/26)<br>[35.3 to 70.6]   | 57.69<br>(15/26)<br>[39.3 to 74.6]   | 95.23<br>(20/21)<br>[87.1 to 100]   | 100<br>(21/21)<br>[21 to 100]      | 95.23<br>(20/21)<br>[87.1 to 100]  |

TABLE IV

Sensitivity of the rapid test 'SD Bioeasy Dengue Duo' for cases with or without history of dengue infection, Federal District (FD), 2014

| History of dengue infection | Number (n) | Sensitivity [CI 95%]                |                                     |                                      |                                      |
|-----------------------------|------------|-------------------------------------|-------------------------------------|--------------------------------------|--------------------------------------|
|                             |            | SD IgM                              | SD IgG                              | SD NSI                               | SD NSI/IgM/IgG                       |
| No                          | 148        | 37.83<br>(56/148)<br>[31.1 to 42.8] | 24.32<br>(36/148)<br>[18.1 to 29.8] | 70.27<br>(104/148)<br>[64.1 to 75.8] | 77.70<br>(115/148)<br>[71.1 to 82.8] |
| Yes                         | 21         | 38.09<br>(8/21)<br>[18.4 to 57.6]   | 33.33<br>(7/21)<br>[13.4 to 52.6]   | 38.09<br>(8/21)<br>[18.4 to 57.6]    | 66.66<br>(14/21)<br>[64 to 67.9]     |

TABLE V

Crude agreement, prevalence index, and Kappa value for each component of the rapid test 'SD Bioeasy Dengue Duo'. Federal District (FD), 2014

|                         | Crude agreement (%) | Prevalence index | Kappa value (CI <sub>95%</sub> ) |
|-------------------------|---------------------|------------------|----------------------------------|
| Component NSI           | 98 (395/401)        | 0.59             | 0.93 (0.89 to 0.96)              |
| Component IgM           | 98 (395/401)        | 0.96             | 0.50 (0.15 to 0.84)              |
| Component IgG           | 99 (398/401)        | 0.96             | 0.75 (0.50 to 0.99)              |
| Acute infection NSI/IgM | 98 (394/401)        | 0.57             | 0.94 (0.90 to 0.97)              |
